# Supplementary material for: Electrospun SnO2/WO3 Heterostructure Nanocomposite Fiber for Enhanced Acetone Vapor Detection
Source: MDPI journal article supplement (doi:10.3390/polym15214318), 2023-11-03
Supplement: s1 [file s1]

# Electrospun $\text{SnO}_2/\text{WO}_3$ Heterostructure Nanocomposite Fiber for Enhanced Acetone Vapor Detection

Ting-Han Lin <sup>1†</sup>, Yin-Hsuan Chang <sup>1†</sup>, Ting-Hung Hsieh <sup>1†</sup>, Yu-Ching Huang <sup>1,2\*</sup>, and Ming-Chung Wu <sup>1,2,3,4\*</sup>

<sup>1</sup> Department of Chemical and Materials Engineering, Chang Gung University, Taoyuan 33302, Taiwan

<sup>2</sup> Department of Materials Engineering, Ming-Chi University of Technology, New Taipei City 24301, Taiwan

<sup>3</sup> Center for Sustainability and Energy Technologies, Chang Gung University, Taoyuan 33302, Taiwan

<sup>4</sup> Division of Neonatology, Department of Pediatrics, Chang Gung Memorial Hospital at Linkou, Taoyuan 33305, Taiwan

\* Correspondence: Y.-C. Huang: [huangyc@mail.mcut.edu.tw](mailto:huangyc@mail.mcut.edu.tw); M.-C. Wu: [mingchungwu@cgu.edu.tw](mailto:mingchungwu@cgu.edu.tw)

† These authors contributed equally to this work as first author.

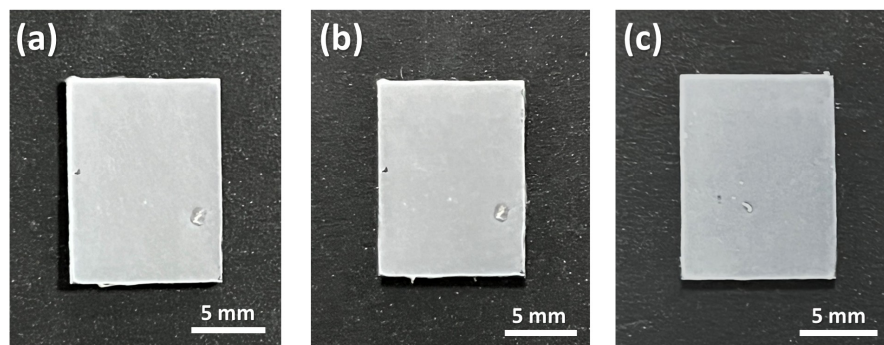

**Figure S1.** Photographs of the PMMA-Ag- $\text{SnO}_2/\text{WO}_3$  sensing fibers: (a) in initial state, (b) post UV-Ozone treatment, and (c) exposure to acetone vapor.

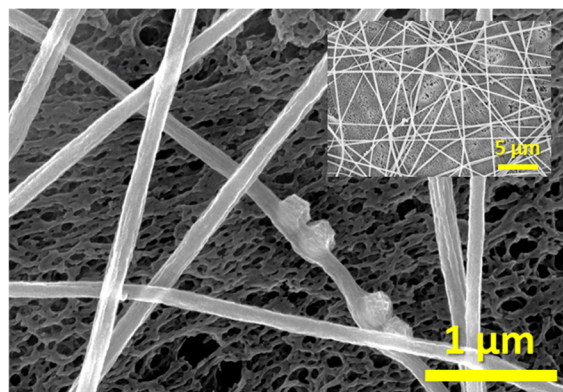

**Figure S2.** Morphology of PMMA-Ag- $\text{SnO}_2/\text{WO}_3$  fibers with UV ozone treatment.

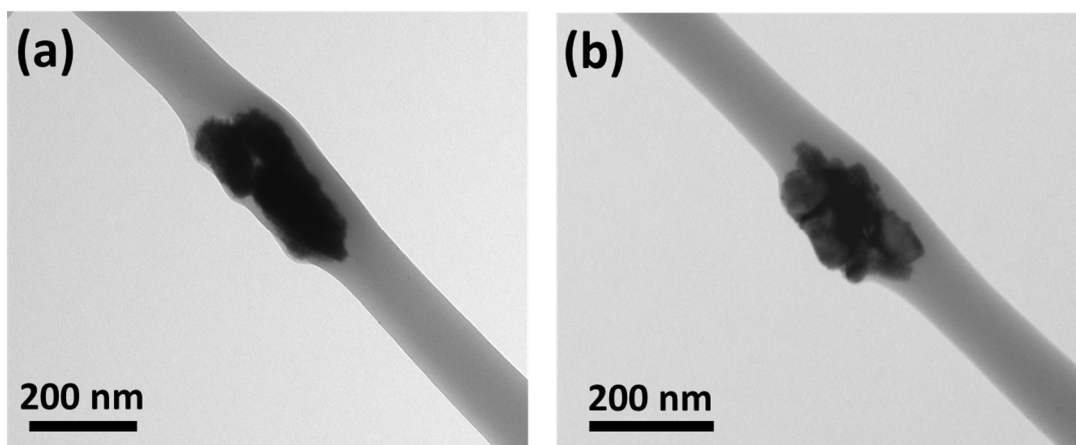

Figure S3. TEM images of PMMA-Ag-SnO<sub>2</sub>/WO<sub>3</sub> fibers (a) without and (b) with UV-ozone treatment.

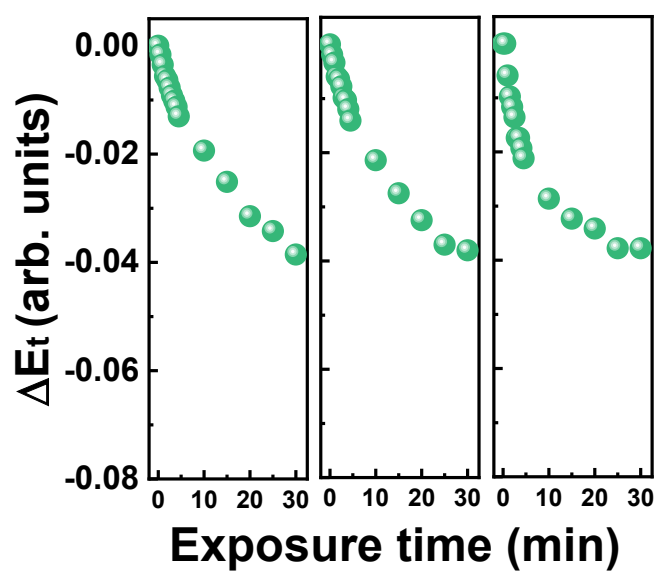

Figure S4. Reproducibility test of PMMA-Ag-SnO<sub>2</sub>/WO<sub>3</sub> fibers exposed to 100 ppm acetone vapor.

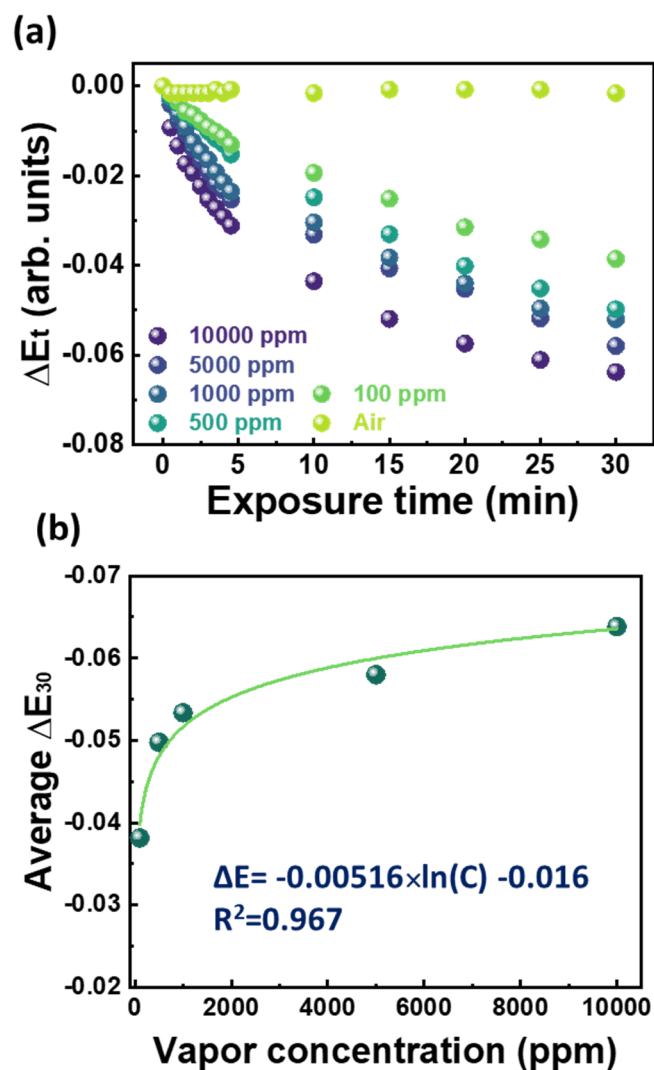

**Figure S5.** (a) Extinction change of PMMA-Ag-SnO<sub>2</sub>/WO<sub>3</sub> fibers exposed to acetone with various concentration ppm over exposure time,  $t$  min and (b) the calibration curve corresponding to 30-min exposure of PMMA-Ag-SnO<sub>2</sub>/WO<sub>3</sub> fibers to acetone vapor.

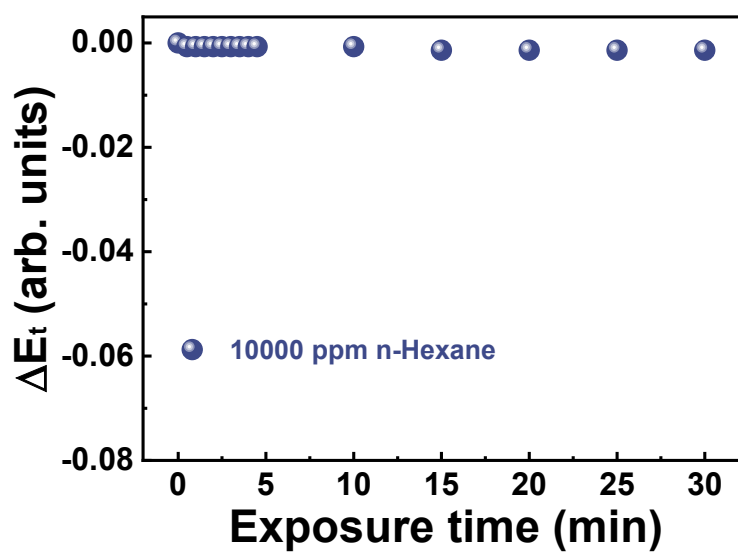

**Figure S6.** Extinction change of PMMA-Ag-SnO<sub>2</sub>/WO<sub>3</sub> fibers exposed to 10,000 ppm n-hexane over exposure time, t min.
